# Supplementary material
Source: publisher site journal article supplement (https://www.dovepress.com/article/134857)
Supplement: Supplementary file 1 [file get_supplementary_file.php%3Ff%3D134857.pdf]

## Supplementary information

### Part 1 – Screening Questionnaire

**Supplementary Table 1:** Questionnaire on skin condition and sunscreens habits (Day 1 before first application)

| Question                                                                        | Possible responses                                                                                                                                                |
|---------------------------------------------------------------------------------|-------------------------------------------------------------------------------------------------------------------------------------------------------------------|
| 1. Do you flush and blush strongly or get a red face in the sun?                | Strongly agree; agree; disagree; strongly disagree                                                                                                                |
| 2. Do you have sensitive skin to products applied on the face?                  | Strongly agree; agree; disagree; strongly disagree                                                                                                                |
| 3. Do you prefer to pick out products that are well tolerated on your face?     | Strongly agree; agree; disagree; strongly disagree                                                                                                                |
| 4. Do you use sunscreens before going in the sun?                               | Yes; No                                                                                                                                                           |
| 5. What Sun Protection Factor (SPF) do you use most often?                      | <30; 30-50; 50+                                                                                                                                                   |
| 6. Are you satisfied with your current sunscreen(s)?                            | Yes; No                                                                                                                                                           |
| 7. If you are not satisfied with your current sunscreen(s), please indicate why | It does not protect my skin from getting red in the sun; It causes skin irritation; I don't like the formula                                                      |
| 8. Which of the following describes your skin condition best?                   | Redness does not persist after flushing and blushing; Redness lasts long after flushing and blushing; Permanent redness of the mid face that flares up in the sun |

### Part 2 – Assessment Questionnaires

**Supplementary Table 2:** Questionnaire on short-term cosmetic acceptability (Day 1 after first application)

| Question                                                                 | Possible responses                                   |
|--------------------------------------------------------------------------|------------------------------------------------------|
| 1. What is your impression of the sunscreen product after the first use? | Very pleasant; pleasant; unpleasant; very unpleasant |
| 2. My skin feels relieved even after a single application:               | Strongly agree; agree; disagree; strongly disagree   |
| 3. The formula does not irritate:                                        | Strongly agree; agree; disagree; strongly disagree   |
| 4. The formula does not cause stinging or burning:                       | Strongly agree; agree; disagree; strongly disagree   |
| 5. My skin is better moisturized even after a first                      | Strongly agree; agree; disagree; strongly disagree   |

|                                                                                                     |                                                    |
|-----------------------------------------------------------------------------------------------------|----------------------------------------------------|
| application:                                                                                        |                                                    |
| 6. The formula is easy to apply:                                                                    | Strongly agree; agree; disagree; strongly disagree |
| 7. The formula is quickly absorbed into the skin/<br>doesn't leave white residues after application | Strongly agree; agree; disagree; strongly disagree |
| 8. The formula does not make my skin appear<br>greasy/oily after a first application                | Strongly agree; agree; disagree; strongly disagree |

**Supplemental Table 3:** Questionnaire on long-term cosmetic acceptability (Day 22)

| Question                                                                                                | Possible responses                                   |
|---------------------------------------------------------------------------------------------------------|------------------------------------------------------|
| 1. What is your overall impression of the sunscreen product?                                            | Very pleasant; pleasant; unpleasant; very unpleasant |
| 2. The formula is easy to apply:                                                                        | Strongly agree; agree; disagree; strongly disagree   |
| 3. My skin is better moisturized after application:                                                     | Strongly agree; agree; disagree; strongly disagree   |
| 4. The formula does not irritate:                                                                       | Strongly agree; agree; disagree; strongly disagree   |
| 5. The formula does not cause stinging or burning:                                                      | Strongly agree; agree; disagree; strongly disagree   |
| 6. The formula helps to prevent facial redness provoked by sun                                          | Strongly agree; agree; disagree; strongly disagree   |
| 7. The formula sufficiently protects my skin from the sun                                               | Strongly disagree; disagree; agree; strongly agree   |
| 8. My rosacea symptoms did not get worse after using the product on my skin:                            | Strongly agree; agree; disagree; strongly disagree   |
| 9. The product is easy to incorporate in my daily skincare regimen                                      | Strongly agree; agree; disagree; strongly disagree   |
| 10. The formula is quickly absorbed into the skin/<br>doesn't leave white residues after<br>application | Strongly agree; agree; disagree; strongly disagree   |
| 11. The formula does not make my skin appear greasy/oily                                                | Strongly agree; agree; disagree; strongly disagree   |
| 12. How would you rate the following characteristics of the product: Texture                            | Very pleasant; pleasant; unpleasant; very unpleasant |
| 13. How would you rate the following characteristics of the product: Color                              | Very pleasant; pleasant; unpleasant; very unpleasant |
| 14. How would you rate the following characteristics of the product: Scent/smell                        | Very pleasant; pleasant; unpleasant; very unpleasant |
| 15. Would you buy this sunscreen product?                                                               | Yes; No                                              |

|                                                                                                                           |                                                                                                                  |
|---------------------------------------------------------------------------------------------------------------------------|------------------------------------------------------------------------------------------------------------------|
| 16. If you have been using another sunscreen before, would you use this sunscreen too or switch for the tested sunscreen? | Will not use tested sunscreen; Will also use the tested sunscreen; Will switch to tested sunscreen               |
| 17. If you prefer the tested sunscreen to your previous one(s), please indicate why.                                      | It better protects my skin from getting red in the sun; It causes less or no skin irritation; I like the formula |
| 18. Would you recommend this sunscreen to your family and friends?                                                        | Yes; No                                                                                                          |

### Part 3 - Detailed results of the questionnaires

**Supplementary Table 4** – Detailed results of Questionnaire on skin condition and sunscreens habits (Day 1 before first application)

| Question                                                                        | Relative Frequency [%] |      |            |      | p-Values |     |
|---------------------------------------------------------------------------------|------------------------|------|------------|------|----------|-----|
|                                                                                 | Disagreement           |      | Agreement  |      |          |     |
| 1. Do you flush and blush strongly or get a red face in the sun?                | 2.3                    |      | 97.7       |      | <0.001*  |     |
| 2. Do you have sensitive skin to products applied on the face?                  | 0.0                    |      | 100.0      |      | <0.001*  |     |
| 3. Do you prefer to pick out products that are well tolerated on your face?     | 0.0                    |      | 100.0      |      | <0.001*  |     |
| 4. Do you use sunscreens before going in the sun?                               | Yes                    |      | No         |      |          |     |
|                                                                                 | n                      | %    | n          | %    |          |     |
|                                                                                 | 43                     | 97.7 | 1          | 2.3  |          |     |
| 5. What Sun Protection Factor (SPF) do you use most often?                      | <30                    |      | 30-50      |      | 50+      |     |
|                                                                                 | n                      | %    | n          | %    | n        | %   |
|                                                                                 | 20                     | 45.5 | 21         | 47.7 | 3        | 6.8 |
| 6. Are you satisfied with your current sunscreen(s)?                            | Yes                    |      | No         |      |          |     |
|                                                                                 | n                      | %    | n          | %    |          |     |
|                                                                                 | 29                     | 65.9 | 15         | 34.1 |          |     |
| 7. If you are not satisfied with your current sunscreen(s), please indicate why | n.a.*                  |      | Unselected |      | Selected |     |
|                                                                                 | n                      | %    | n          | %    | n        | %   |
|                                                                                 |                        |      |            |      |          |     |

|                                                               |                                                      |      |                                                  |      |                                                             |      |
|---------------------------------------------------------------|------------------------------------------------------|------|--------------------------------------------------|------|-------------------------------------------------------------|------|
| 7.A It does not protect my skin from getting red in the sun   | 29                                                   | 65.9 | 3                                                | 6.8  | 12                                                          | 27.3 |
| 7.B It causes skin irritation                                 | 29                                                   | 65.9 | 10                                               | 22.7 | 5                                                           | 11.4 |
| 7.C I don't like the formula                                  | 29                                                   | 65.9 | 9                                                | 20.5 | 6                                                           | 13.6 |
| 8. Which of the following describes your skin condition best? | Redness does not persist after flushing and blushing |      | Redness lasts longer after flushing and blushing |      | Permanent redness of the mid face that flares up in the sun |      |
|                                                               | n                                                    | %    | n                                                | %    | n                                                           | %    |
|                                                               | 9                                                    | 20.5 | 23                                               | 52.3 | 12                                                          | 27.3 |

n.a.: not applicable \*: significant,  $p \leq 0.05$

**Supplementary Table 5:** Detailed results of Questionnaire on short-term cosmetic acceptability (Day 1 after first application)

| Question                                                                                         | Relative Frequency [%] |              | p-Values |
|--------------------------------------------------------------------------------------------------|------------------------|--------------|----------|
|                                                                                                  | Unpleasantness         | Pleasantness |          |
| 1. What is your impression of the sunscreen product after the first use?                         | 9.1                    | 90.9         | <0.001*  |
|                                                                                                  | Relative Frequency [%] |              | p-Values |
|                                                                                                  | Disagreement           | Agreement    |          |
| 2. My skin feels relieved even after a single application:                                       | 18.2                   | 81.8         | <0.001*  |
| 3. The formula does not irritate:                                                                | 6.8                    | 93.2         | <0.001*  |
| 4. The formula does not cause stinging or burning:                                               | 4.5                    | 95.5         | <0.001*  |
| 5. My skin is better moisturized even after a first application:                                 | 15.9                   | 84.1         | <0.001*  |
| 6. The formula is easy to apply:                                                                 | 0.0                    | 100.0        | <0.001*  |
| 7. The formula is quickly absorbed into the skin/ doesn't leave white residues after application | 11.4                   | 88.6         | <0.001*  |
| 8. The formula does not make my skin appear greasy/oily after a first application                | 13.6                   | 86.4         | <0.001*  |

\*: significant,  $p \leq 0.05$

**Supplementary Table 6:** Details results of Questionnaire on long-term cosmetic acceptability (Day 22)

| Question                                                                                          | Relative Frequency [%]                                                                              |              | p-Values |
|---------------------------------------------------------------------------------------------------|-----------------------------------------------------------------------------------------------------|--------------|----------|
|                                                                                                   | Unpleasantness                                                                                      | Pleasantness |          |
| 1. What is your overall impression of the sunscreen product?                                      | 15.9                                                                                                | 84.1         | <0.001*  |
|                                                                                                   | Relative Frequency [%]                                                                              |              | p-Values |
|                                                                                                   | Disagreement                                                                                        | Agreement    |          |
| 2. The formula is easy to apply:                                                                  | 4.5                                                                                                 | 95.5         | <0.001*  |
| 3. My skin is better moisturized after application:                                               | 13.6                                                                                                | 86.4         | <0.001*  |
| 4. The formula does not irritate:                                                                 | 4.5                                                                                                 | 95.5         | <0.001*  |
| 5. The formula does not cause stinging or burning:                                                | 4.5                                                                                                 | 95.5         | <0.001*  |
| 6. The formula helps to prevent facial redness provoked by sun                                    | 9.1                                                                                                 | 90.9         | <0.001*  |
| 7. The formula sufficiently protects my skin from the sun                                         | 0.0                                                                                                 | 100.0        | <0.001*  |
| 8. My rosacea symptoms did not get worse after using the product on my skin:                      | 2.3                                                                                                 | 97.7         | <0.001*  |
| 9. The product is easy to incorporate in my daily skincare regimen                                | 9.1                                                                                                 | 90.9         | <0.001*  |
| 10. The formula is quickly absorbed into the skin/ doesn't leave white residues after application | 25.0                                                                                                | 75.0         | <0.001*  |
| 11. The formula does not make my skin appear greasy/oily                                          | 22.7                                                                                                | 77.3         | <0.001*  |
|                                                                                                   | Unpleasantness                                                                                      | Pleasantness |          |
| 12. How would you rate the following characteristics of the product: Texture                      | 13.6                                                                                                | 86.4         | <0.001*  |
| 13. How would you rate the following characteristics of the product: Color                        | 11.4                                                                                                | 88.6         | <0.001*  |
| 14. How would you rate the following characteristics of the product: Scent/smell                  | 6.8                                                                                                 | 93.2         | <0.001*  |
| 15. Would you buy this sunscreen                                                                  | <div style="display: flex; justify-content: space-around;"> <span>Yes</span> <span>No</span> </div> |              |          |

|                                                                                                                           |                               |  |      |                                    |    |  |                                 |  |    |          |      |  |    |  |      |  |
|---------------------------------------------------------------------------------------------------------------------------|-------------------------------|--|------|------------------------------------|----|--|---------------------------------|--|----|----------|------|--|----|--|------|--|
| product?                                                                                                                  | n                             |  | %    |                                    | n  |  | %                               |  |    |          |      |  |    |  |      |  |
|                                                                                                                           | 35                            |  | 79.5 |                                    | 9  |  | 20.5                            |  |    |          |      |  |    |  |      |  |
| 16. If you have been using another sunscreen before, would you use this sunscreen too or switch for the tested sunscreen? | Will not use tested sunscreen |  |      | Will also use the tested sunscreen |    |  | Will switch to tested sunscreen |  |    |          |      |  |    |  |      |  |
|                                                                                                                           | n                             |  | %    |                                    | n  |  | %                               |  | n  |          | %    |  |    |  |      |  |
|                                                                                                                           | 9                             |  | 20.5 |                                    | 13 |  | 29.5                            |  | 22 |          | 50.0 |  |    |  |      |  |
| 17. If you prefer the tested sunscreen to your previous one(s), please indicate why.                                      | n.a.**                        |  |      | m.v.***                            |    |  | Unselected                      |  |    | Selected |      |  |    |  |      |  |
|                                                                                                                           | n                             |  | %    |                                    | n  |  | %                               |  | n  |          | %    |  |    |  |      |  |
| 17.A It better protects my skin from getting red in the sun                                                               | 9                             |  | 20.5 |                                    | 2  |  | 4.5                             |  | 4  |          | 9.1  |  | 29 |  | 65.9 |  |
| 17.B It causes less or no skin irritation                                                                                 | 9                             |  | 20.5 |                                    | 2  |  | 4.5                             |  | 16 |          | 36.4 |  | 17 |  | 38.6 |  |
| 17.C I like the formula                                                                                                   | 9                             |  | 20.5 |                                    | 2  |  | 4.5                             |  | 13 |          | 29.5 |  | 20 |  | 45.5 |  |
| 18. Would you recommend this sunscreen to your family and friends?                                                        | Yes                           |  |      |                                    |    |  | No                              |  |    |          |      |  |    |  |      |  |
|                                                                                                                           | n                             |  |      | %                                  |    |  | n                               |  |    | %        |      |  |    |  |      |  |
|                                                                                                                           | 35                            |  |      | 79.5                               |    |  | 9                               |  |    | 20.5     |      |  |    |  |      |  |

\*\* : n.a.: not applicable \*\*\*: m.v.: missing value \*: significant,  $p \leq 0.05$

#### Part 4 - Diary recordings of adverse events

**Supplemental Table 7:** Summary of Adverse events recorded in subject diaries

| Subject Identification Number | Adverse event         | Discontinued study | Reasonable probability that the adverse event was related to the study product |
|-------------------------------|-----------------------|--------------------|--------------------------------------------------------------------------------|
| 32                            | Pustule on chin       | Yes                | Yes                                                                            |
| 32                            | Papules on left cheek | Yes                | Yes                                                                            |
| 7                             | Headache              | No                 | No                                                                             |
| 34                            | Migraine              | No                 | No                                                                             |
| 40                            | Toothache             | No                 | No                                                                             |
